# Supplementary figures and images for: Dynamic metastable long-living droplets formed by sticker-spacer proteins
Source: eLife journal article supplement (doi:10.7554/elife.56159), 2020-06-02

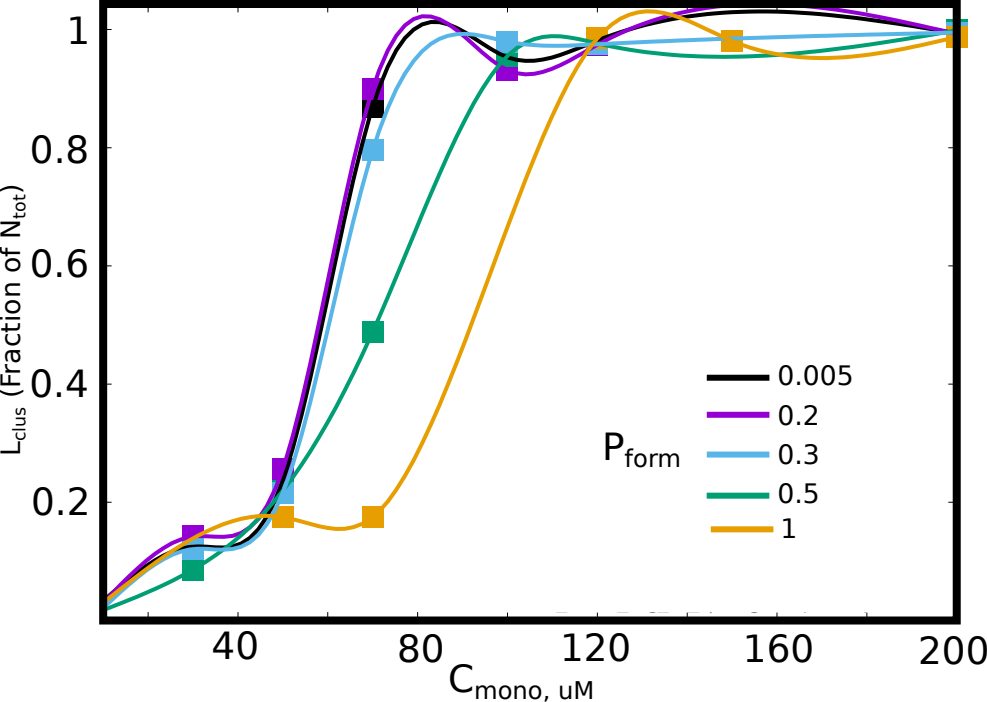

Supplement: supp [file elife_poa_e56159_Figure_3_figure_supplement_1.pdf › elife_poa_e56159_Figure_3_figure_supplement_1.pdf]

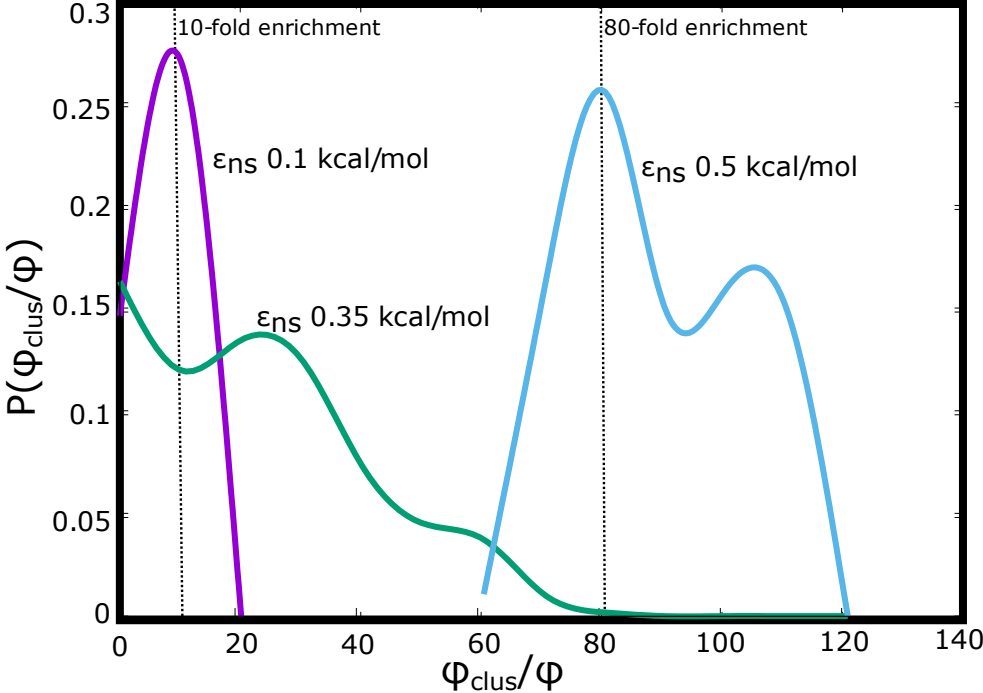

Supplement: supp [file elife_poa_e56159_Figure_5_figure_supplement_2.pdf › elife_poa_e56159_Figure_5_figure_supplement_2.pdf]

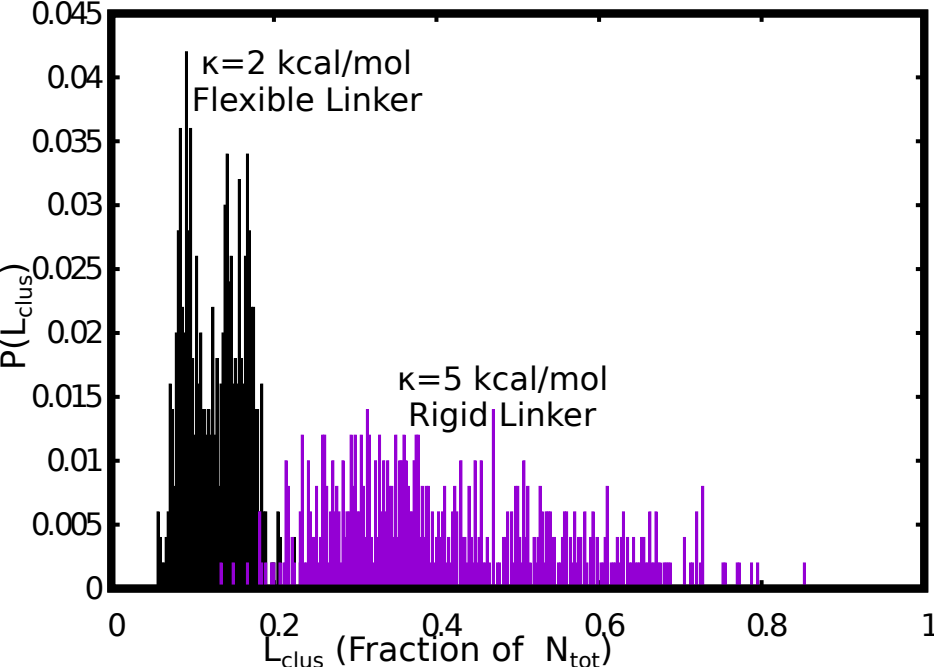

Supplement: supp [file elife_poa_e56159_Figure_5_figure_supplement_3.pdf › elife_poa_e56159_Figure_5_figure_supplement_3.pdf]

**A**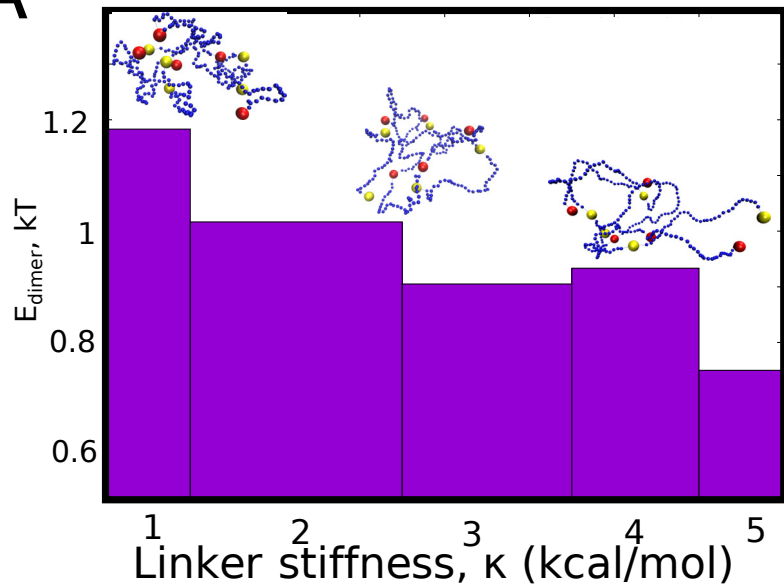**B**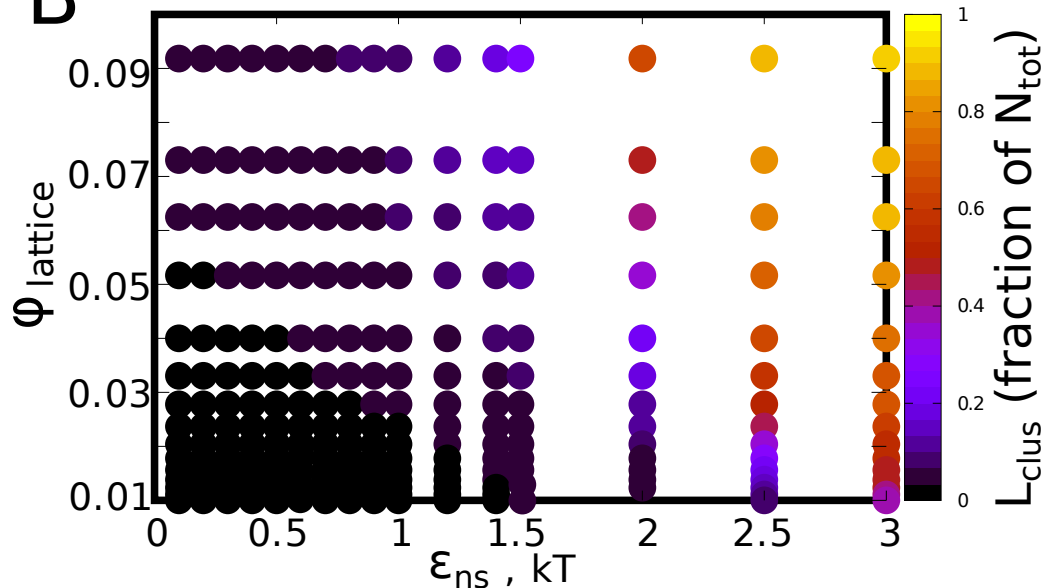

Supplement: supp [file elife_poa_e56159_Figure_7_figure_supplement_4.pdf › elife_poa_e56159_Figure_7_figure_supplement_4.pdf]

**A** $\lambda = 3$ 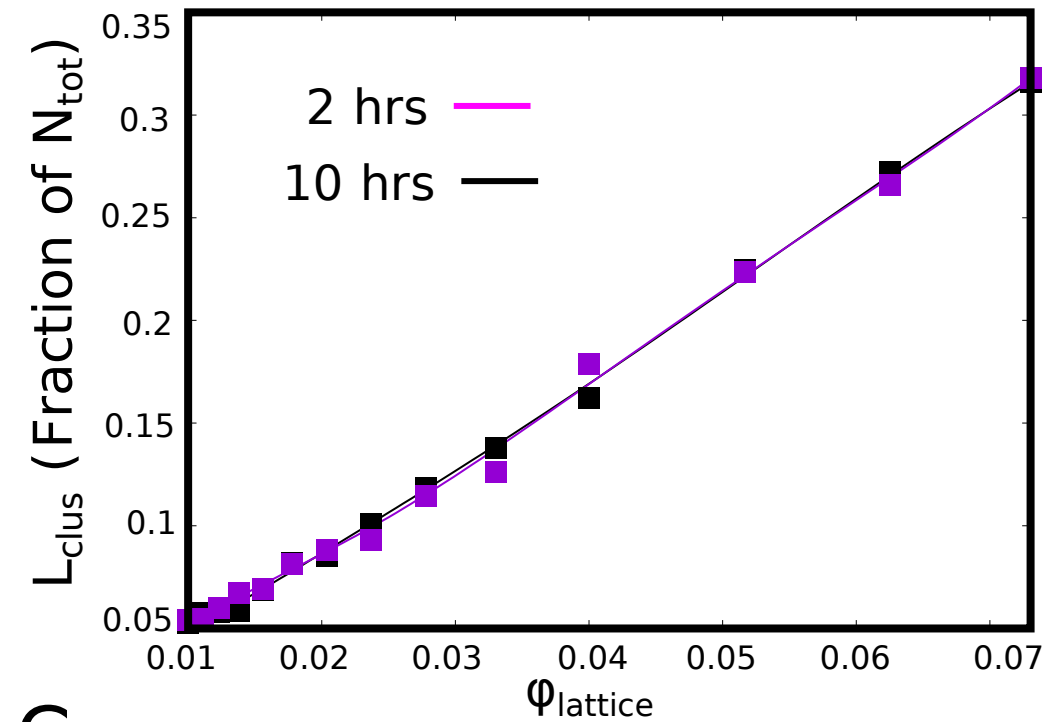**B** $\lambda = 5$ 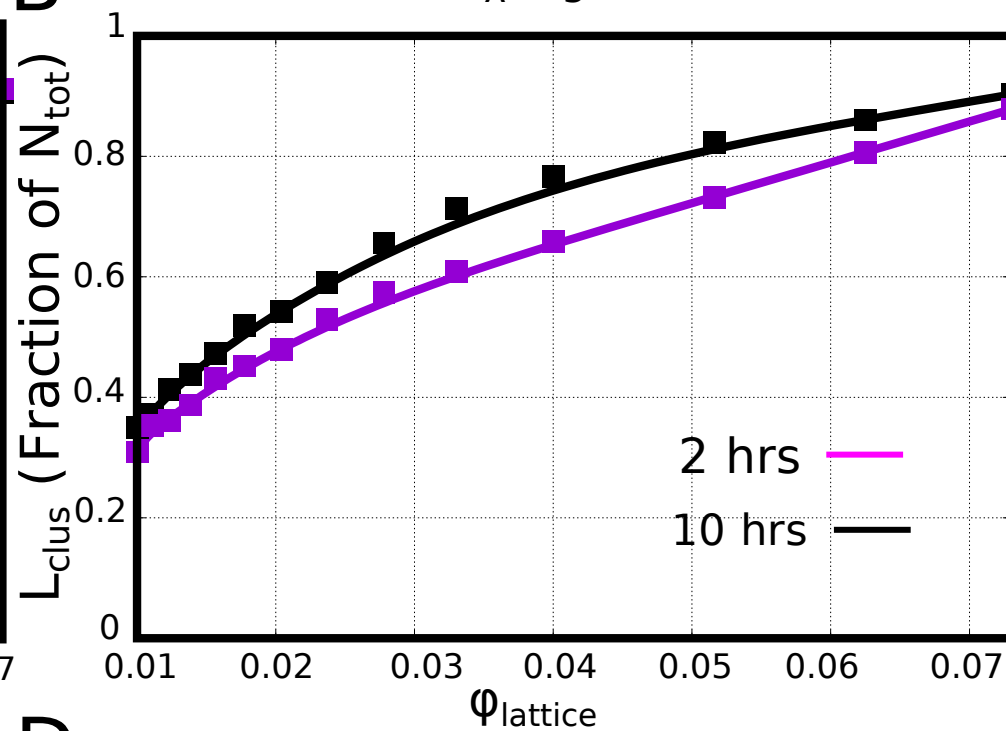**C**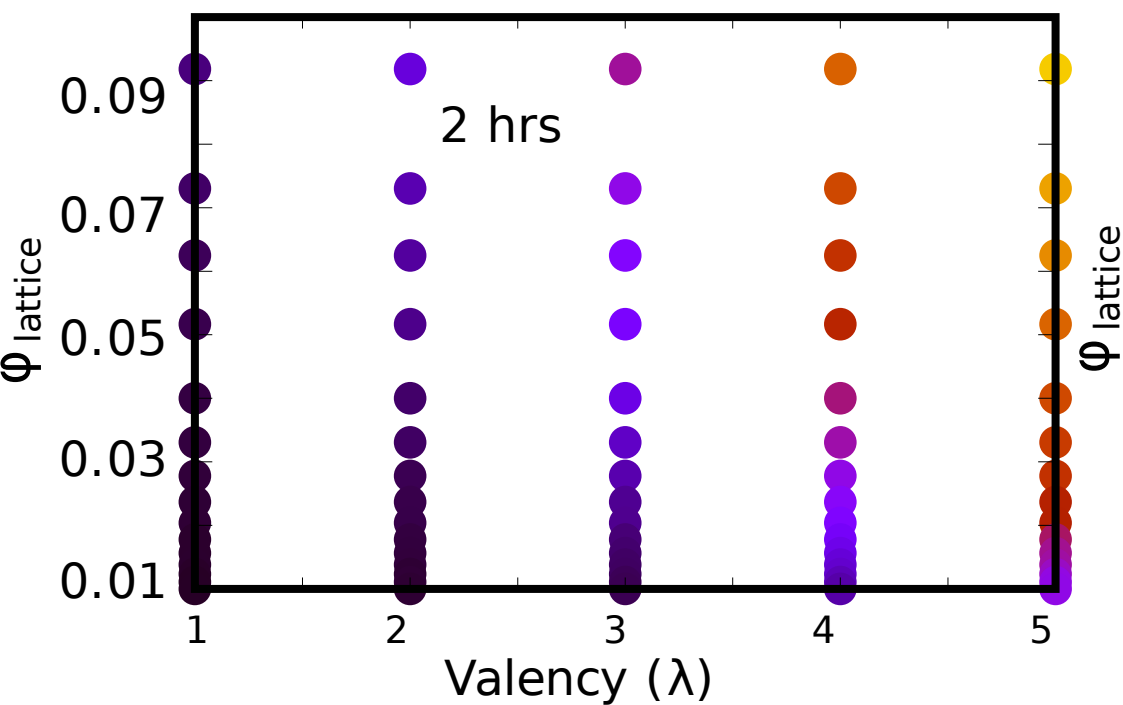**D**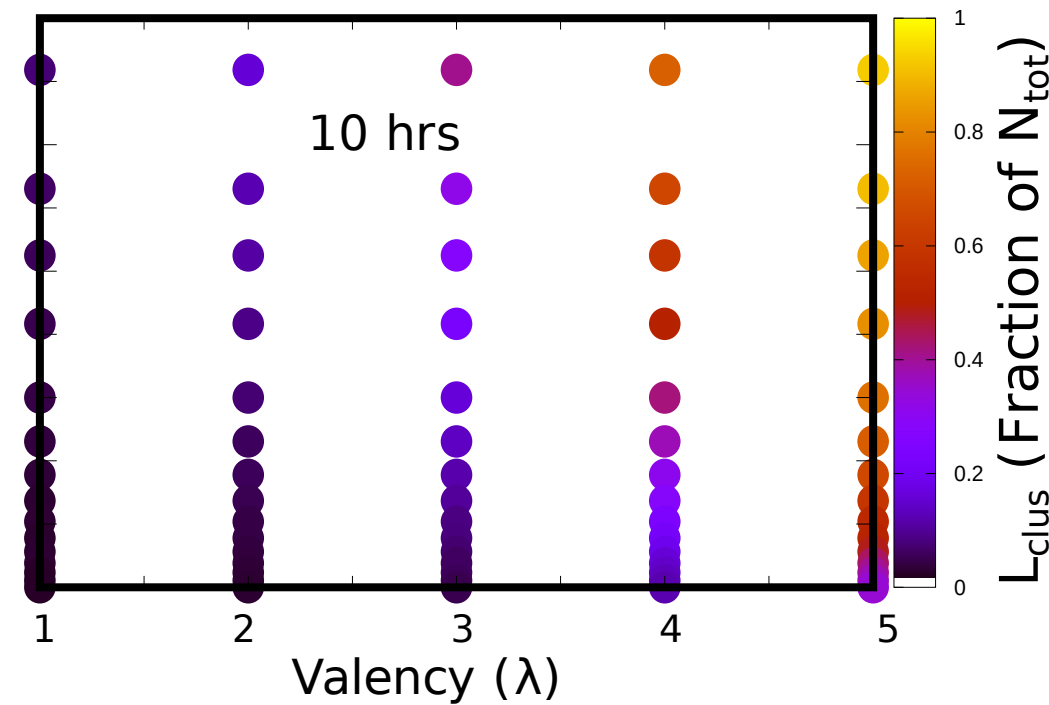

Supplement: supp [file elife_poa_e56159_Figure_7_figure_supplement_5.pdf › elife_poa_e56159_Figure_7_figure_supplement_5.pdf]

**A**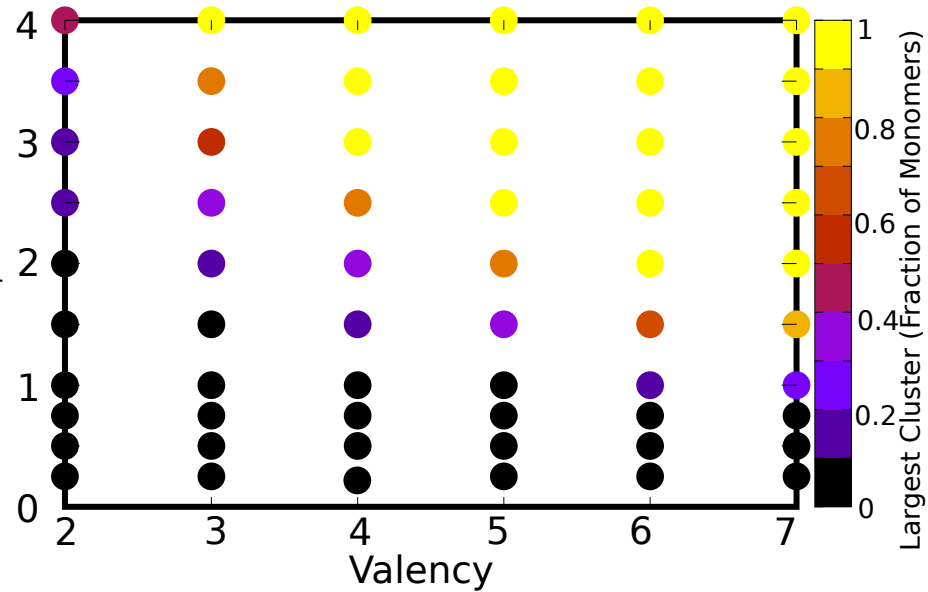**B**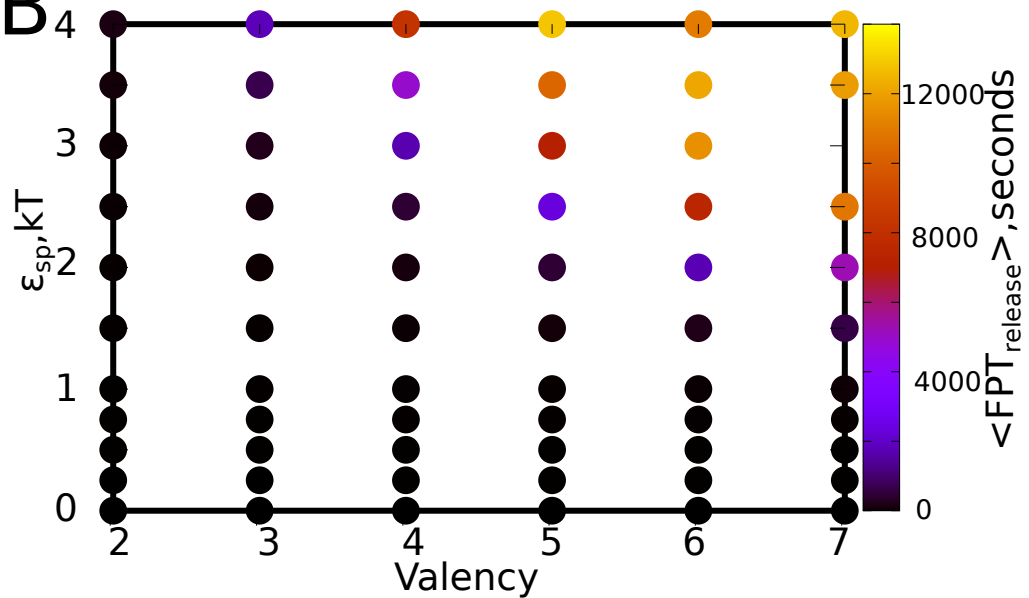

Supplement: supp [file elife_poa_e56159_Figure_8_figure_supplement_1.pdf › elife_poa_e56159_Figure_8_figure_supplement_1.pdf]

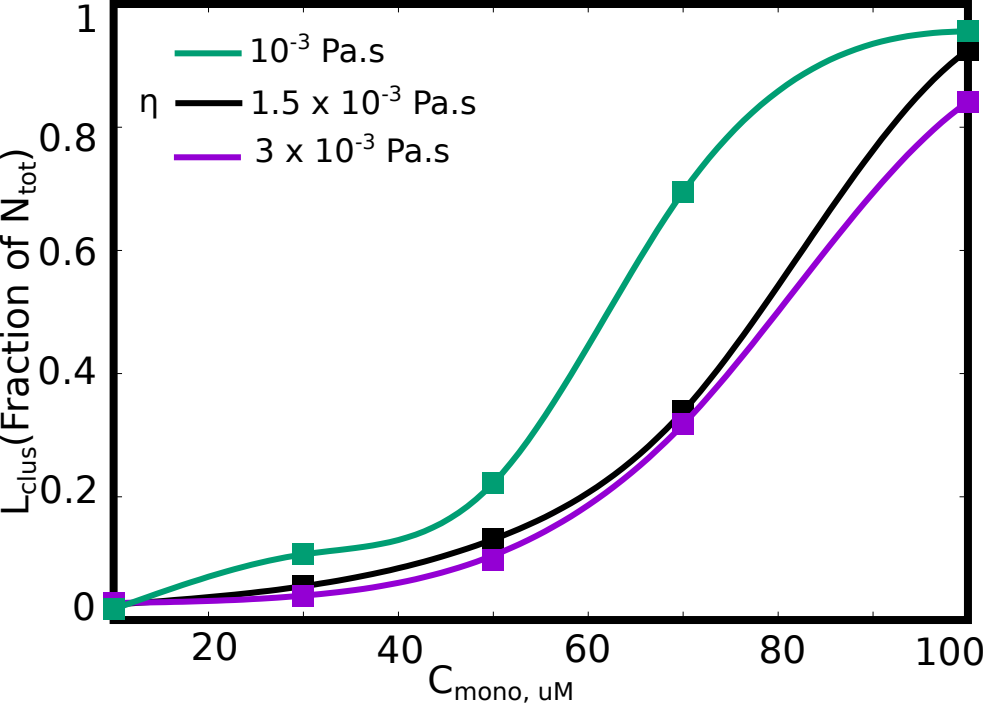

Supplement: supp [file elife_poa_e56159_Figure_9_figure_supplement_1.pdf › elife_poa_e56159_Figure_9_figure_supplement_1.pdf]
